# Supplementary material for: Highly sensitive MLH1 methylation analysis in blood identifies a cancer patient with low-level mosaic MLH1 epimutation
Source: PubMed Central journal article supplement (PMC6883525; doi:10.1186/s13148-019-0762-6), 2019-11-28

**Table S1. Primers used in the study**

**A. Primers and conditions**

| Gene        | Analysis                    | Primer name           | Forward Primer (5'-3')           | Reverse Primer (5'-3')                | Ta (°C) |
|-------------|-----------------------------|-----------------------|----------------------------------|---------------------------------------|---------|
| <i>MLH1</i> | MS-MCA                      | MLH1C_PCR_ext         | TATTTTGTGTTTTATTGGTTGG           | CCAATCAAATTTCTCAACTCTATA              | 50      |
|             |                             | MLH1C_PCR_int         | TGTTTTATTGGTTGGATATTT            | CCAATCAAATTTCTCAACTCTATA              | 50      |
|             |                             | MLH1D_PCR_ext         | AGGTATTGAGGTGATTGGTTG            | CAATTCTCAATCATCTCTTTAATAACA           | 50      |
|             |                             | MLH1D_PCR_int         | GGTGATTGGTTGAAGGTATTTT           | ATCATCTCTTTAATAACATTAACCTAACC         | 50      |
|             | Pyrosequencing              | Piro_PCR_MLH1_C       | TTYGGTATTTTGTGTTTTATTGGTTGG      | [Btn]AAACAACCTAAATACCAATCAAATTTCTCAAC | 58      |
|             |                             | Piro_Seq_MLH1_C       | TAAAAAYGAATTAATAGGAA             | -                                     | -       |
|             |                             | Piro_PCR_MLH1_intron1 | ATTTAGYGGTTAGTTAATGTTATTAAGAGATG | [Btn]TAAACATACRCTATACATACCTCTACCC     | 56      |
|             |                             | Piro_Seq_MLH1_intron1 | AGTYGGGTTTATTTAAGGGTTA           | -                                     | -       |
|             | Clonal Bisulfite sequencing | PCR_MLH1_CD           | TTTTAAAAAYGAATTAATAGGAAGAG       | CAATTCTCAATCATCTCTTTAATAA             | 55      |
|             | Clonal Sequencing           | PCR_MLH1_cDNA         | GCATTCAAGCTGTCCAATCA             | AGGTACAGGAATGGGTGTGTG                 | 64      |
|             |                             | Seq_MLH1_cDNA_int     | GCAGTCCTTTGAGGATTTAGC            | TCCATCAGCTGTTTTCGTT                   | -       |
|             | ASE (SNUPe)                 | rs179997_PCR_cDNA     | CACAATGCAGGCATTAGTTTCTC          | AGGTACAGGAATGGGTGTGTG                 | 59      |
|             |                             | rs179997_PCR_gDNA     | GTTTCAGTCTCAGCCATGAG             | ACACATGATTCACGCCACAG                  | 55      |
|             |                             | rs179997_snupe        |                                  | TTCTCGACTAACAGCATTTCCAAAGA            | 50      |

**B. Localization of the probes and regions analyzed in the study of *MLH1* methylation. The *EMP2AIP1-MLH1* CpG island (colored in dark purple) encompass the *MLH1* promoter and intron 1**

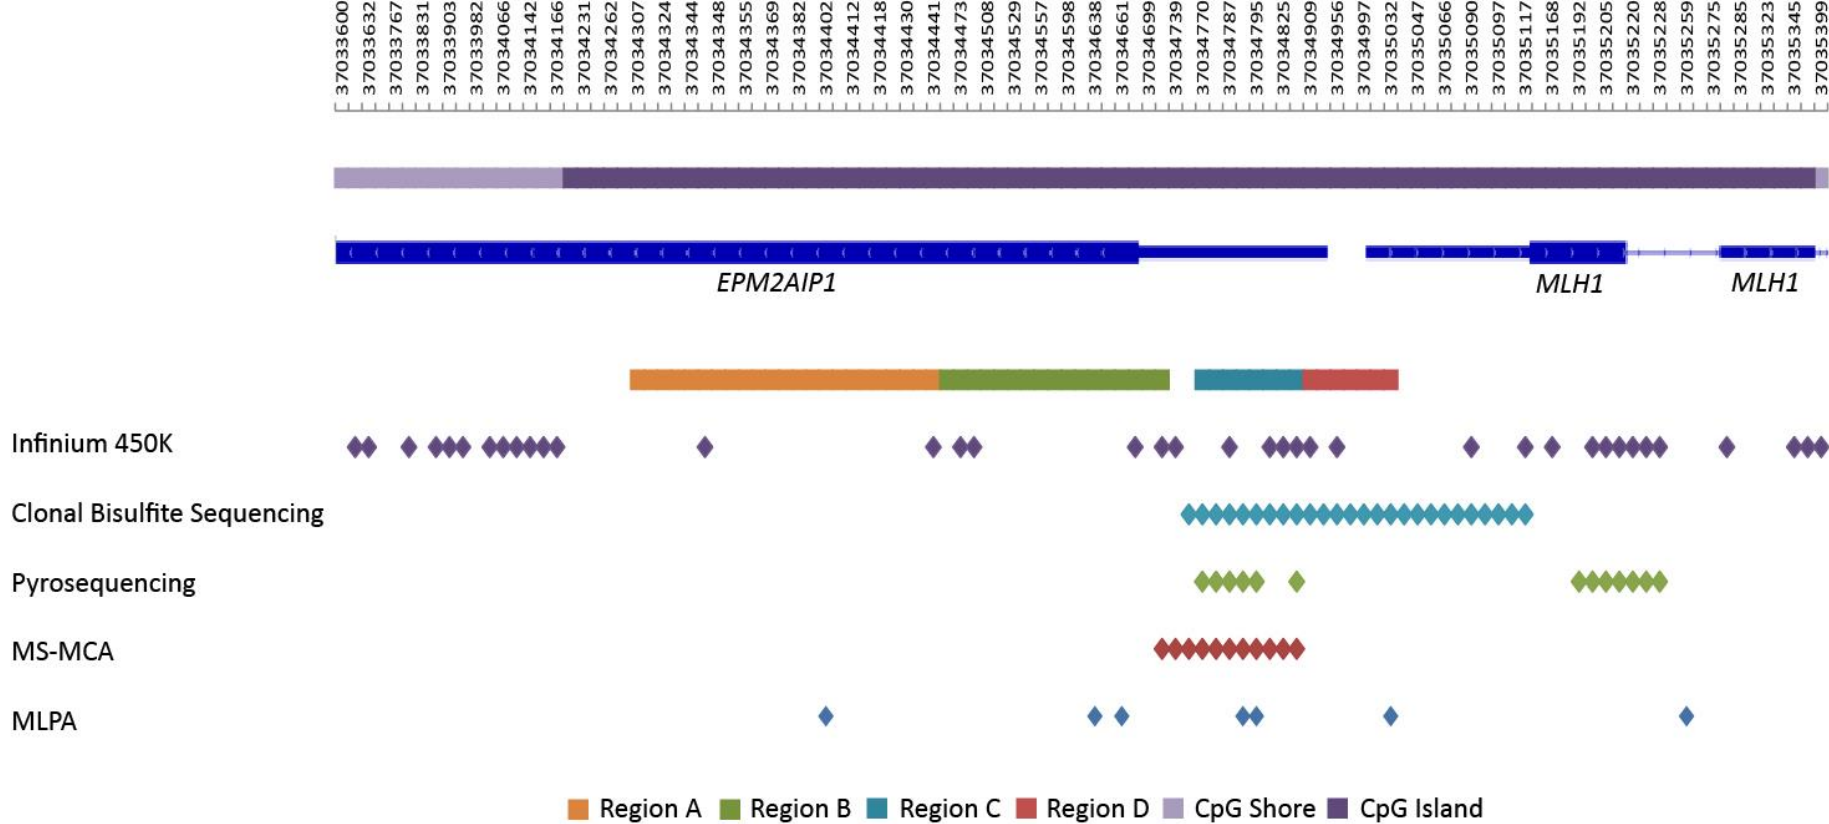

Supplement: 13148_2019_762_MOESM12_ESM.pdf [file 13148_2019_762_MOESM12_ESM.pdf]
