# Supplementary material for: Highly sensitive MLH1 methylation analysis in blood identifies a cancer patient with low-level mosaic MLH1 epimutation
Source: PubMed Central journal article supplement (PMC6883525; doi:10.1186/s13148-019-0762-6), 2019-11-28
Supplement: 13148_2019_762_MOESM8_ESM.pdf [file 13148_2019_762_MOESM8_ESM.pdf]

**Table S3. Variants identified in the mutational analysis of hereditary cancer genes in case 29**

| Variant calling |             |             |                          | Coverage             |            | rs ID       | MAF         | <i>In silico</i> predictions |                  |                   |                   |                   | ClinVar Classification   |
|-----------------|-------------|-------------|--------------------------|----------------------|------------|-------------|-------------|------------------------------|------------------|-------------------|-------------------|-------------------|--------------------------|
| Gene            | Transcript  | cDNA change | Predicted protein change | Allele Frequency (%) | Read Depth |             | genomAD (%) | Splicing                     | Protein function |                   |                   |                   |                          |
|                 |             |             |                          |                      |            | SIFT        |             |                              | Mutation Taster  | Polyphen2 /HumDiv | Polyphen2 /HumVar |                   |                          |
| XRCC2           | NM_005431.1 | c.115G>A    | p.V39M                   | 45,19                | 104        | rs730882040 | 0,01        | No changes                   | Delete rious     | Disease causing   | Possibly damaging | Possibly damaging | Uncertain significance** |
