# Supplementary material for: Highly sensitive MLH1 methylation analysis in blood identifies a cancer patient with low-level mosaic MLH1 epimutation
Source: PubMed Central journal article supplement (PMC6883525; doi:10.1186/s13148-019-0762-6), 2019-11-28
Supplement: 13148_2019_762_MOESM10_ESM.pdf [file 13148_2019_762_MOESM10_ESM.pdf]

Highly sensitive *MLH1* methylation screening:

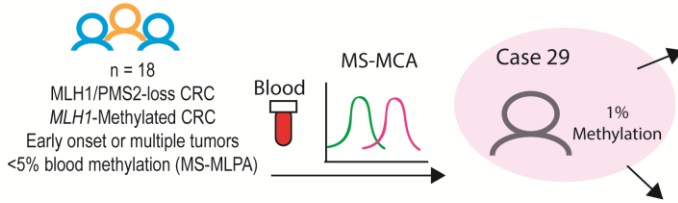

Clinico-pathological characterization

- Immunohistochemical staining  
 Somatic mutation analysis:
- Mutations in KRAS, NRAS and BRAF by the Idylla™ platform
  - NGS customized panel of 126 genes (I2HCP v2.1)

Confirmation of the mosaic constitutional *MLH1* epimutation

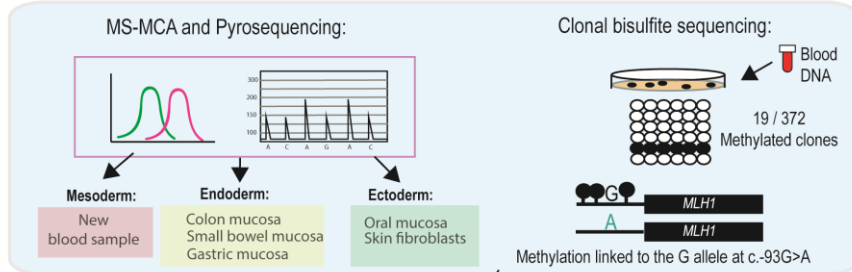

Characterization and classification of *MLH1* epimutation

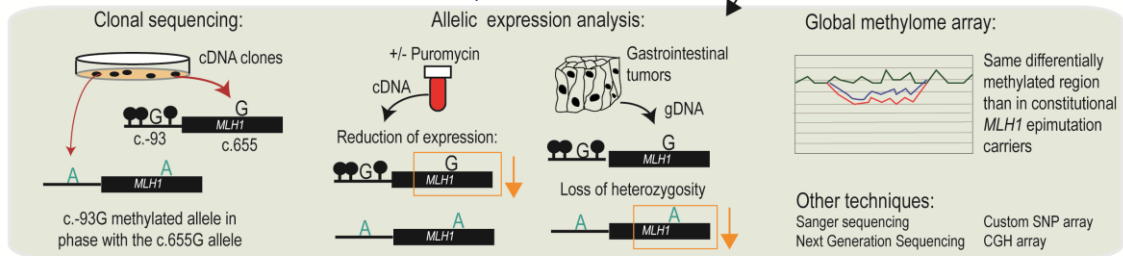

**Figure S6.** Schematic representation of the methodological strategy and summary of the obtained results
